# Supplementary material for: Inter-laboratory evolution of a model organism and its epistatic effects on mutagenesis screens
Source: PubMed Central journal article supplement (PMC5131308; doi:10.1038/srep38001), 2016-12-01
Supplement: srep38001-s1.pdf [file srep38001-s1.pdf]

## Supplementary Information

Inter-laboratory evolution of a model organism and its epistatic effects on mutagenesis screens

Michael D. Bradley, Devin Neu, Fatmagul Bahar, and Roy D. Welch\*

### Inventory of Supplementary Information:

**Table S1:** Summary of ANOVAs with outliers removed.

**Table S2:** Source of *M. xanthus* sublines used in this study.

**Table S3:** Summary of read mappings.

**Table S4:** Primers used to generate DNA fragments for plasmids.

**Table S5:** Plasmids used to construct mutant strains.

**Supplementary Table S1. Summary of ANOVAs with outliers removed.**

| <b>Quantitative trait</b>   | <b><i>F</i> (DFn, DFd)</b> | <b><i>P</i> value</b> |
|-----------------------------|----------------------------|-----------------------|
| Expansion rate (A motility) | 4.340 (6, 28)              | 0.0032                |
| Expansion rate (S motility) | 1.776 (6, 28)              | 0.1405                |
| Aggregate count             | 78.81 (6, 14)              | < 0.0001              |
| Viable spore count          | 13.34 (6, 14)              | < 0.0001              |

A one-way analysis of variance (ANOVA) was performed for each quantitative trait with sublines S1 and S9 removed from the analysis. Degrees of freedom (DF) are calculated from the number of sublines (nine, numerator) and replicate experiments (three or five, denominator). Aggregate count data were normalized by log-transforming prior to analysis. Significant differences in subline means are indicated by  $P < 0.05$ .

Supplementary Table S2. Source of *M. xanthus* sublines used in this study.

| Subline | Source                          |
|---------|---------------------------------|
| S1      | University of Georgia           |
| S2      | Augustana College               |
| S3      | Michigan St. University         |
| S4      | Syracuse University             |
| S5      | University of Iowa              |
| S6      | Wayne State University          |
| S7      | University of California, Davis |
| S8      | Syracuse University             |
| S9      | University of Wyoming           |

Supplementary Table S3. Summary of read mappings.

| Library | Mapped read count | Average length (bp) |
|---------|-------------------|---------------------|
| S1      | 6,897,065         | 126.88              |
| S2      | 12,922,299        | 128.15              |
| S3      | 6,872,636         | 128.98              |
| S4      | 6,199,545         | 126.16              |
| S5      | 7,266,263         | 129.7               |
| S6      | 6,433,845         | 126.76              |
| S7      | 8,677,798         | 126.24              |
| S8      | 9,871,644         | 126.64              |
| S9      | 8,199,433         | 127.55              |

Supplementary Table S4. Primers used to generate DNA fragments for plasmids.

| Target ORF | Primer Sequence           | Plasmid |
|------------|---------------------------|---------|
| MXAN4601   | F: CGAATACAACGTGGACCTCT   | pS1.a   |
|            | R: AGGGAGTTGAACTGGAGGAT   |         |
|            | C: GGAGAGCAAAGACTTTACCG   |         |
| MXAN4762   | F: TTCGACGGTGACTTTCTACC   | pS1.b   |
|            | R: GCCAAAAGTCACCGTCTTG    |         |
|            | C: GACCAGATAGGGAAGTACGTG  |         |
| MXAN7041   | F: ATCCTCTCGCAGGTGAGC     | pS9.a   |
|            | R: ATTGAAGAGCGGGTTGCT     |         |
|            | C: GACATGAAGGACCTCTACCAAC |         |

ORF, open reading frame; F, forward; R, reverse; C, confirmation.

Supplementary Table S5. Plasmids used to construct mutant strains.

| Mutant strain | Parent subline | Plasmid | Source     |
|---------------|----------------|---------|------------|
| S1_7041       | S1             | pS9.a   | This study |
| S8_4601       | S8             | pS1.a   | This study |
| S8_4762       | S8             | pS1.b   | This study |
| S8_7041       | S8             | pS9.a   | This study |
| S9_4601       | S9             | pS1.a   | This study |
